# Supplementary material for: Hypoglycemia on Admission, Associated Factors, and Early Outcome Among Neonates Admitted to the Neonatal Unit at Muhimbili National Hospital
Source: Research Square preprint supplement (doi:10.21203/rs.3.rs-7616907/v1), 2025-10-13
Supplement: Supplementary file 1 [file 1291b3a69f740e873061f621.docx]

Proforma for Prevalence, Risk Factors, and Clinical Outcomes of Neonatal Hypoglycemia.

Section 1: Neonatal Information

1.Neonatal ID: _______________________________________

2.Date of Birth: ______________________________________

3.Gestational Age (in weeks): _________________________

4. Postnatal Age (in hours/days): ______________________

5.Sex (M/F): _______________________________________

6.Birth Weight(in grams): ___________________________

7.Current Weight (in grams): _________________________

8. Apgar Score

- 1 minute: ______

- 5 minutes: ______

9. Mode of Delivery :

- Vaginal (Spontaneous/Induced)

- Caesarean Section (Elective/Emergency)

10. Place of Delivery:

- Home

- Clinic

- Hospital (Tertiary/Secondary/Primary)

11. Clinical Diagnosis on Admission: ____________________

12.RBG at Presentation: ___________ mmol/L

13.Treatment Given: __________________________________

14.RBG After 30 Minutes: ___________ mmol/L

15. Outcome of Admission:

- Discharged

- Transferred

- Re-admission

- Death

- Other (Specify): _______________

Section 2: Maternal Information

Maternal Socio-demographic Data

1. Maternal Age: _____________ years

2. Parity:

- Primipara

- Multipara: specify (_________)

3. Educational Level:

- No Formal Education

- Primary

- Secondary

- Tertiary

1. Occupation: ______________________________________

5. Social Class (Based on occupation, income, or family size):

- Upper

- Middle

- Lower

6. Marital Status:

- Married

- Single

- Divorced

- Widowed

Maternal Obstetric Data

1. History of Diabetes (GDM/Pre-existing): Yes / No

8. History of Preeclampsia/Eclampsia : Yes / No

9. Antenatal Care (ANC) Attendance:

- Regular

- Irregular

- None

1. Maternal Nutrition During Pregnancy:

- Satisfactory

- Poor

Section 3: Neonatal Health Parameters

1. Mode of Nutrition (on presentation):

- Breastfeeding

- Formula Feeding

- Mixed Feeding

- None

2. Neonatal Nutritional Status (e.g., malnourished, underweight): ____________________________________

3. Comorbidities/Other Diagnoses: ____________________________________

4. Infection Status(e.g., sepsis, respiratory infections): ____________________________________

5.Temperature at Presentation: ___________ °C

6. Respiratory Rate at Presentation: __________ breaths/min

7.Heart Rate at Presentation: __________ bpm

8. Oxygen Saturation: __________%

Section 4: Follow-up & Outcomes

1. Neonatal Outcome:

- Full Recovery

- Partial Recovery

- Continued Hypoglycemia

- Complications (Specify): _______________

- Death

2. Re-admission Details (if applicable): ___________________________________

3. Long-term Follow-up Plan: ___________________________________________

The proforma was adopted from:

Obi JO, Olorunfemi G, Anyanwu F. Neonatal hypoglycaemia: Prevalence and clinical outcome in a tertiary health facility in North-Central Nigeria. Int J Health Sci Res. 2019;9(6):229–237. Available from: https://www.ijhsr.org/IJHSR_Vol.9_Issue.6_June2019/IJHSR_Abstract.034.html
