# Supplementary material for: Hypoglycemia on Admission, Associated Factors, and Early Outcome Among Neonates Admitted to the Neonatal Unit at Muhimbili National Hospital
Source: Research Square preprint supplement (doi:10.21203/rs.3.rs-7616907/v1), 2025-10-13
Supplement: Supplementary file 2 [file d3a5510d5f05fab769058ad8.docx]

Neonatal Characteristics

| **Gestation age** |  |  |
| --- | --- | --- |
| Preterm | 87 | 66.9 |
| Term | 43 | 33.1 |
| **Sex** |  |  |
| Male | 55 | 42.3 |
| Female | 75 | 57.7 |
| **Chronological age** |  |  |
| Less than 24hrs | 77 | 59.2 |
| Greater than 24hrs | 53 | 40.8 |
| **Neonatal weight** |  |  |
| Low birth weight | 60 | 46.2 |
| Normal birth weight | 66 | 50.8 |
| Macrosomia | 4 | 3.0 |

Feeding practices, comorbidities, and clinical diagnoses.

| **VARIABLE** | **FREQUENCY** | **PERCENT** |
| --- | --- | --- |
| **Feeding** |  |  |
| None | 9 | 7.0 |
| Breastfeeding | 119 | 91.5 |
| Formula feeding | 2 | 1.5 |
| **Comorbidities** |  |  |
| None | 39 | 30.0 |
| Jaundice | 33 | 25.4 |
| Respiratory distress | 32 | 24.6 |
| Sepsis | 26 | 20.0 |
| **Clinical diagnosis at presentation** |  |  |
| Sepsis | 35 | 26.9 |
| Jaundice | 22 | 16.9 |
| Premature | 22 | 16.9 |
| Respiratory distress | 32 | 24.6 |
| Hypoglycemia | 11 | 8.5 |
| Seizures | 1 | 0.8 |
| Macrosomia | 4 | 3.1 |
| Anemia of prematurity | 2 | 1.5 |
| Birth asphyxia | 1 | 0.8 |

Maternal characteristics and demographics

| **VARIABLE** | **FREQUENCY** | **PERCENT** |
| --- | --- | --- |
| **Maternal age** |  |  |
| 18-32 | 70 | 53.8 |
| 33-45 | 60 | 46.2 |
| **Maternal diabetic status** |  |  |
| Yes | 28 | 21.5 |
| No | 102 | 78.5 |

| **VARIABLE** | **FREQUENCY** | **PERCENT** |
| --- | --- | --- |
| **Mode of delivery** |  |  |
| Spontaneous vaginal delivery | 27 | 20.8 |
| Induced vaginal delivery | 31 | 23.8 |
| Elective c-section | 36 | 27.7 |
| Emergency c-section | 36 | 27.7 |
| **Place of delivery** |  |  |
| Home | 3 | 2.3 |
| Primary hospital | 28 | 21.5 |
| Secondary hospital | 51 | 39.2 |
| Tertiary hospital | 48 | 36.9 |
| **Social class** |  |  |
| Upper class | 19 | 14.6 |
| Middle class | 52 | 40.0 |
| Lower class | 59 | 45.4 |

prevalence of neonatal hypoglycemia

|  | **FREQUENCY** | **PERCENT** |
| --- | --- | --- |
| **HYPOGLYCEMIA** | 37 | 28.5 |
| **NORMAL** | 93 | 71.5 |

Factors associated with hypoglycemia

|  | **HYPOGLYCEMIA** | **NORMAL** | **P-VALUE** |
| --- | --- | --- | --- |
| **GESTATION AGE** |  |  |  |
| Preterm | 30 | 57 |  |
| Term | 7 | 36 | 0.030 |
| **Sex** |  |  |  |
| Male | 12 | 43 |  |
| Female | 25 | 50 | 0.151 |
| **Chronological age** |  |  |  |
| Less than 24 hours | 26 | 51 |  |
| Greater than 24 hours | 11 | 42 | 0.106 |
| **Neonatal weight** |  |  |  |
| Low birth weight | 18 | 42 |  |
| Normal birth weight | 15 | 51 |  |
| Macrosomia | 4 | 0 | 0.004 |
| **Feeding** |  |  |  |
| None | 8 | 1 |  |
| Breastfeeding | 28 | 91 |  |
| Formula feeding | 0 | 1 | 0.001 |
| **Comorbidities** |  |  |  |
| None | 11 | 28 |  |
| Jaundice | 11 | 22 |  |
| Respiratory distress | 10 | 22 |  |
| Sepsis | 5 | 21 | 0.660 |
| **Clinical diagnosis at presentation** |  |  |  |
| Sepsis | 8 | 27 |  |
| Jaundice | 5 | 17 |  |
| Premature | 5 | 17 |  |
| Respiratory distress | 8 | 24 |  |
| Hypoglycemia | 7 | 4 |  |
| Seizures | 1 | 0 |  |
| Macrosomia | 4 | 0 |  |
| Anemia of prematurity | 0 | 2 |  |
| Birth asphyxia | 0 | 1 | 0.011 |
| **Maternal age** |  |  |  |
| 18-32 | 18 | 52 |  |
| 33-45 | 19 | 41 | 0.453 |
| **Maternal diabetic status** |  |  |  |
| Yes | 16 | 12 |  |
| No | 21 | 81 | 0.001 |
| **Mode of delivery** |  |  |  |
| Spontaneous vaginal delivery | 6 | 21 |  |
| Induced vaginal delivery | 11 | 20 |  |
| Elective c-section | 14 | 22 |  |
| Emergency c-section | 6 | 30 | 0.130 |
| **Place of delivery** |  |  |  |
| Home | 1 | 2 |  |
| Primary hospital | 9 | 19 |  |
| Secondary hospital | 11 | 40 |  |
| Tertiary hospital | 16 | 32 | 0.578 |
| **Social class** |  |  |  |
| Upper class | 8 | 11 |  |
| Middle class | 17 | 35 |  |
| Lower class | 12 | 47 | 0.128 |

Management practices

|  | **HYPOGLYCEMIA** | **NORMAL** | **P-VALUE** |
| --- | --- | --- | --- |
| **NONE** | 7 | 93 |  |
| **ORAL FEEDING** | 22 | 0 |  |
| **IV DEXTROSE** | 8 | 0 | 0.001 |

Neonatal outcome.

|  | **HYPOGLYCEMIA** | **NORMAL** | **P-VALUE** |
| --- | --- | --- | --- |
| **NONE** | 6 | 93 |  |
| **FULL RECOVERY** | 16 | 0 |  |
| **PARTIAL RECOVERY** | 3 | 0 |  |
| **CONTINUED HYPOGLYCEMIA** | 9 | 0 |  |
| **DEATH** | 3 | 15 | 0.001 |
